# Supplementary material
Source: PubMed Central journal article supplement (PMC59744)
Supplement: pnas_211297698_1.pdf [file pnas_211297698_1.pdf]

Supporting information for Hellmich *et al.* (September 14, 2001) *Proc. Natl. Acad. Sci. USA*, 10.1073/pnas.211297698.

**Table 3.** Mean 96-h larval weight (mg), standard error (SE), and treatment sample size (*n*) for first instar *Danaus plexippus* after exposure to milkweed leaves with no pollen and leaves with various levels of pollen from Bt11 and Mon810 events (Cry1Ab), Dbt418 event (Cry1Ac), Cbh351 event (Cry9C), and Tc1507 event (Cry1F) hybrids, and near-isoline hybrids

| Event  | Trial*         | <i>n</i> | SE  | No pollen | Mean pollen levels (grains/cm <sup>2</sup> ) |            |                |           |                |                   |                |            |                |           |
|--------|----------------|----------|-----|-----------|----------------------------------------------|------------|----------------|-----------|----------------|-------------------|----------------|------------|----------------|-----------|
|        |                |          |     |           | 100–300                                      |            | 301–600        |           | 601–1000       |                   | 1001–1600      |            | >1600          |           |
|        |                |          |     |           | Non- <i>Bt</i>                               | <i>Bt</i>  | Non- <i>Bt</i> | <i>Bt</i> | Non- <i>Bt</i> | <i>Bt</i>         | Non- <i>Bt</i> | <i>Bt</i>  | Non- <i>Bt</i> | <i>Bt</i> |
| Bt11   | 1              | 12       | 1.8 | 8.1       |                                              |            | 10.9, 10.5     | 8.2, 12.5 | 8.7            | 7.5               | 11.3           | 9.6        |                |           |
|        | 2              | 9        | 2.1 | 15.8      | 15.0                                         | 12.7       | 19.4           | 16.5      | 15.9           | 17.6              | 16.5           | 16.3       |                |           |
|        | 3              | 12       | 2.7 | 22.9      |                                              |            | 20.0           | 15.8      |                |                   | 17.8, 16.6     | 13.9, 14.6 | 6.4, 10.5      | 8.6, 9.6  |
|        | 4              | 10       | 2.5 | 18.3      | 13.9, 15.3                                   | 17.7, 11.4 | 12.7           | 9.2       | 11.1           | 12.7              |                |            |                |           |
|        | 5              | 12       | 1.6 | 11.0      |                                              |            | 15.1           | 12.6      | 11.7           | 9.2               | 13.1, 12.6     | 15.0, 11.6 | 11.6           | 11.0      |
|        | 6              | 12       | 1.9 | 22.6      |                                              |            | 20.8           | 21.7      | 19.0, 18.7     | 20.3, 17.9        | 23.4, 21.6     | 19.1, 20.0 |                |           |
|        | 7 <sup>†</sup> | 4        | 1.4 | 10.0      | 9.6                                          | 9.0        | 11.7           | 11.8      | 11.2           | 11.2              | 10.5, 10.1     | 9.5, 9.5   | 12.2           | 9.2       |
| Mon810 | 1              | 10       | 1.3 | 10.5      |                                              |            | 8.8            | 7.1       | 8.5            | 10.8              | 6.8, 8.8       | 9.3, 6.1   |                |           |
|        | 2              | 9        | 3.6 | 18.3      |                                              |            | 9.3            | 17.5      | 16.7, 17.3     | 15.2, 16.0        | 14.0           | 7.8        |                |           |
|        | 3              | 12       | 1.7 | 16.4      | 16.1                                         | 13.7       | 13.3           | 11.4      | 11.3           | 17.2 <sup>‡</sup> | 10.8           | 14.9       | 14.9           | 12.0      |
| Dbt418 | 1              | 12       | 1.9 | 15.7      | 13.1                                         | 11.9       |                |           | 12.7           | 13.4              | 15.3, 12.2     | 14.2, 12.8 | 12.3           | 13.5      |
|        | 2              | 12       | 1.9 | 11.9      |                                              |            | 13.4           | 12.6      | 13.3, 13.3     | 11.9, 11.2        | 14.4           | 12.6       | 9.5            | 12.3      |
| Cbh351 | 1              | 12       | 2.6 | 17.2      |                                              |            | 15.9           | 16.9      | 13.4, 12.0     | 15.8, 13.8        | 15.0           | 14.5       |                |           |
| Tc1507 | 1              | 12       | 2.3 | 12.0      |                                              |            | 12.9           | 16.0      | 14.8, 14.7     | 16.8, 10.6        | 13.6           | 13.0       |                |           |

Assigning treatments to pollen-level categories sometimes resulted in two means per trial by level combination.

\*Non-*Bt* and *Bt* hybrids used in each trial include: Bt11 (Trial 1, N7070, N7070Bt), (2, N4242, N4242Bt), (3, N67-H6, N67-T4), (4 & 5, N3030, N3030Bt), (6, N59-Q9, N58-D1), (7, N26-L6, N27-M3); Mon810 (1, 3893, 38G17), (2 & 3, 3489, 34R07); Dbt418 (1, DK595, DK595Bt), (2, DK566, DK566Bt); Cbh351 (G8600, G8600Bt); Tc1507 (M2722, experimental hybrid).

<sup>†</sup>Ten larvae were weighed in Ontario for each sample; <sup>‡</sup>,  $P < 0.05$  based on contrast comparisons.
